# Supplementary material for: White OLEDs based on a novel EuIII-tetrakis-β-diketonate doped into 4,4′-N,N′-dicarbazolebiphenyl as emitting material
Source: Royal Society of Chemistry journal article supplement (doi:10.1039/c5tc00638d), 2015-01-01
Supplement: c5tc00638d1.pdf [file c5tc00638d1.pdf]

## Electronic Supplementary Information

### White OLEDs Based on a Novel $\text{Eu}^{\text{III}}$ -Tetrakis- $\beta$ -Diketonate Doped into 4,4'-*N,N'*-Dicarbazolebiphenyl as Emitting Material†

Silvanose Biju, Liang-Jin Xu, Cheng-Zhe Sun and Zhong-Ning Chen\*

*State Key Laboratory of Structural Chemistry, Fujian Institute of Research on the Structure of Matter, Chinese Academy of Science, Fuzhou, Fujian 35002, People's Republic of China*

**Table S1.** CIE coordinates and emission colours of the devices ITO/PEDOT: PSS (50 nm)/NBu<sub>4</sub> [EuL<sub>4</sub>] (10% or 20%): CBP (63% or 56%)-OXD7 (27% or 24%) (50 nm)/TPBI (50 nm)/LiF (1.5 nm)/Al (120 nm) at different voltages.

| 10% NBu <sub>4</sub> [EuL <sub>4</sub> ] |       |       |        |
|------------------------------------------|-------|-------|--------|
| Voltage                                  | x     | y     | Colour |
| 6V                                       | 0.612 | 0.322 | Red    |
| 7V                                       | 0.598 | 0.313 | Red    |
| 8V                                       | 0.394 | 0.342 | White  |
| 9V                                       | 0.337 | 0.321 | White  |
| 10V                                      | 0.302 | 0.297 | White  |
| 11V                                      | 0.295 | 0.274 | White  |
| 12V                                      | 0.274 | 0.270 | White  |
| 13V                                      | 0.261 | 0.272 | White  |
| 20% NBu <sub>4</sub> [EuL <sub>4</sub> ] |       |       |        |
| 6V                                       | 0.617 | 0.311 | Red    |
| 7V                                       | 0.576 | 0.300 | Red    |
| 8V                                       | 0.339 | 0.328 | White  |
| 9V                                       | 0.328 | 0.282 | White  |
| 10V                                      | 0.302 | 0.272 | White  |
| 11V                                      | 0.295 | 0.274 | White  |
| 12V                                      | 0.279 | 0.263 | White  |
| 13V                                      | 0.262 | 0.260 | White  |

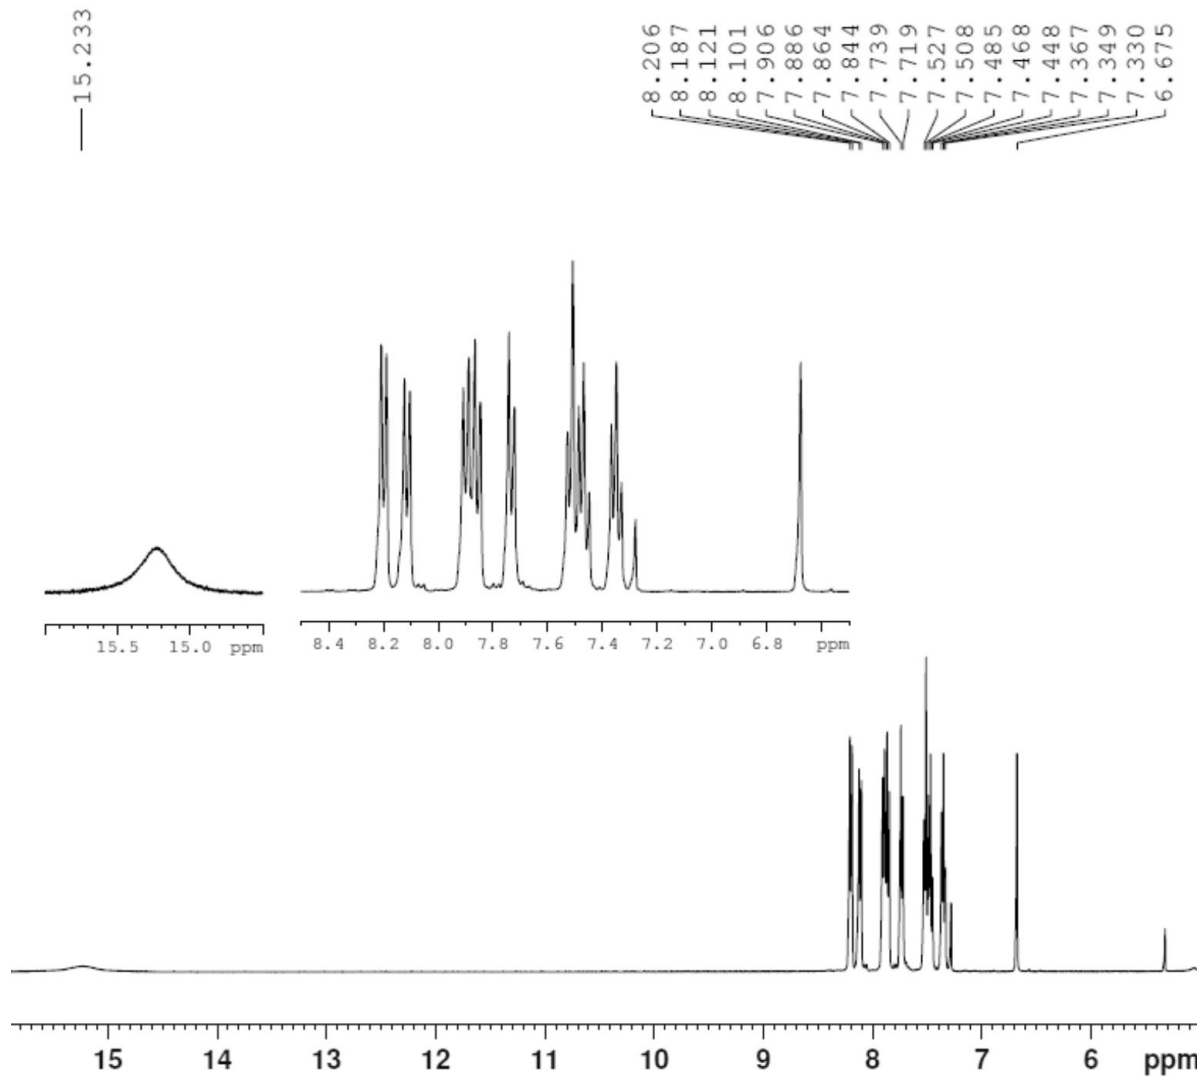

**Fig. S1**  $^1\text{H}$  NMR Spectrum of HL in  $\text{CDCl}_3$

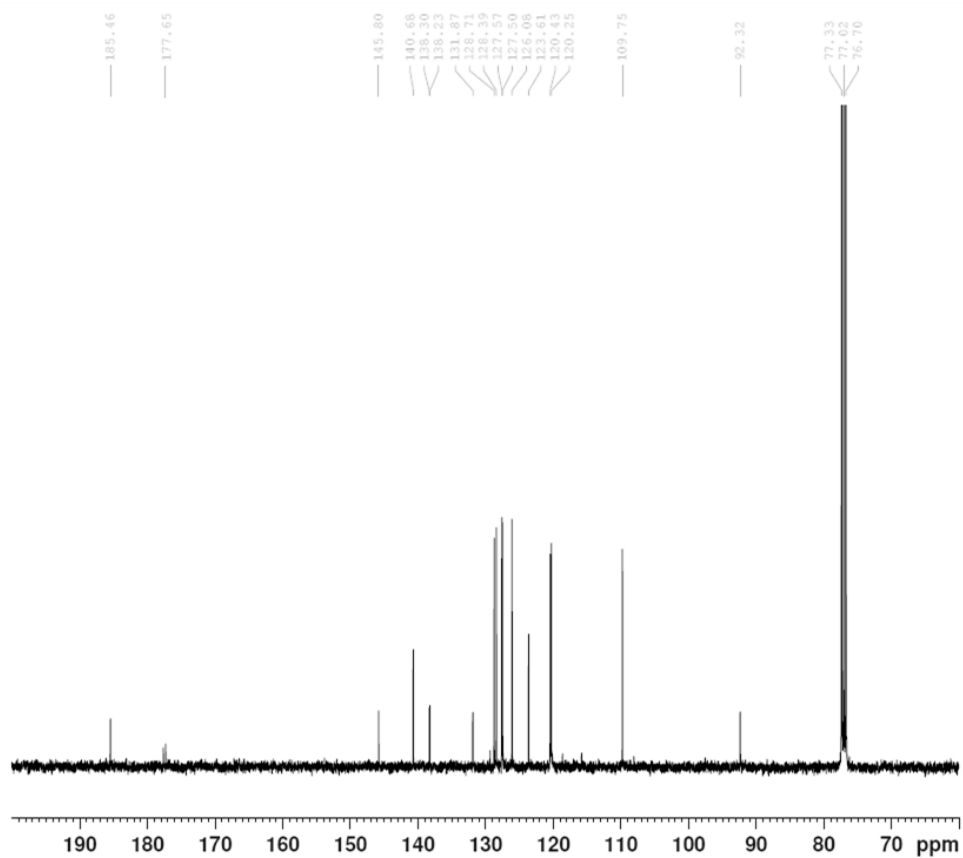

**Fig. S2**  $^{13}\text{C}$  NMR Spectrum of HL in  $\text{CDCl}_3$ .

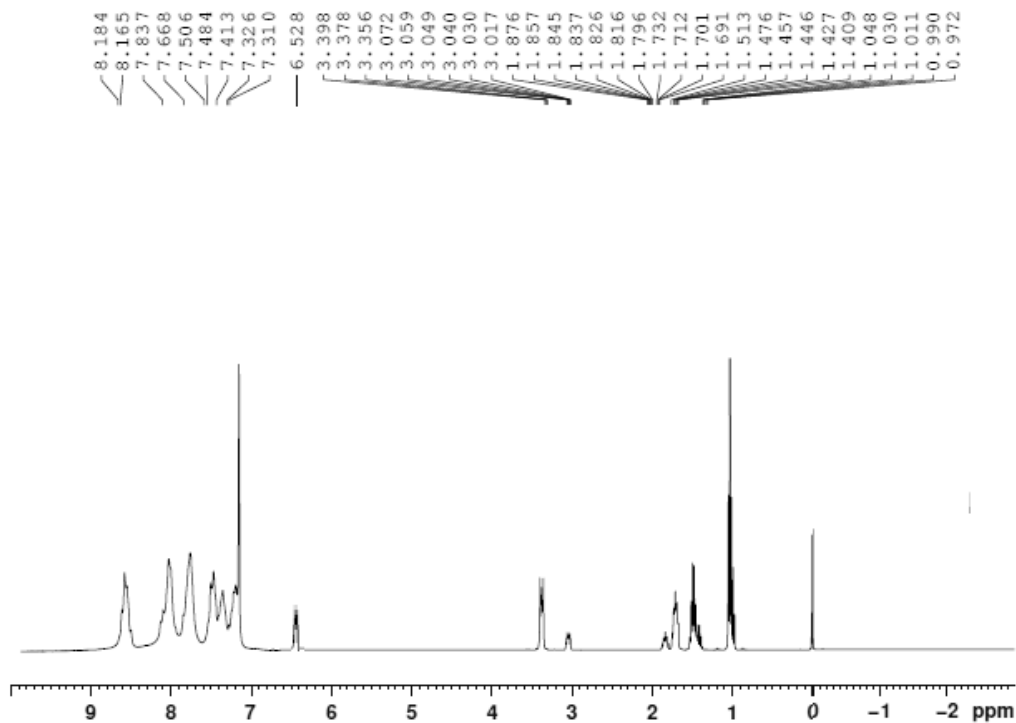

**Fig. S3**  $^1\text{H}$  NMR Spectrum of  $\text{NBu}_4[\text{LaL}_4]$  in  $\text{CDCl}_3$ .

Sb-LaL24 # 53 RT. 2.60 AV.1 NL : 2.38E5

T: - cESI Full ms [200.00-3000.00]

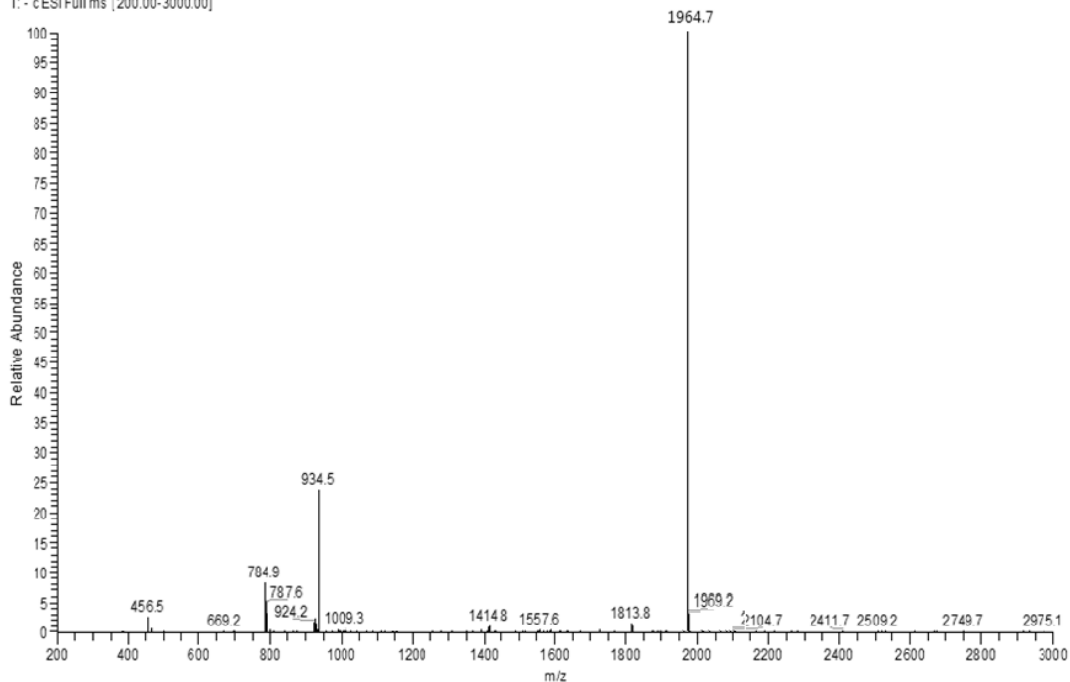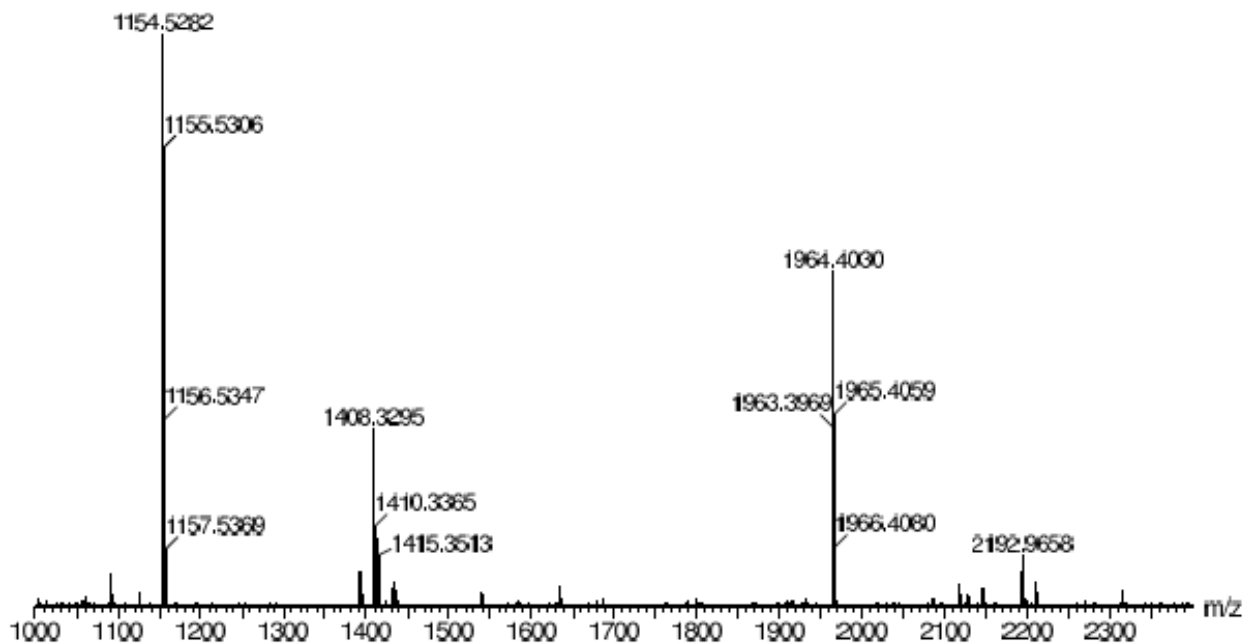

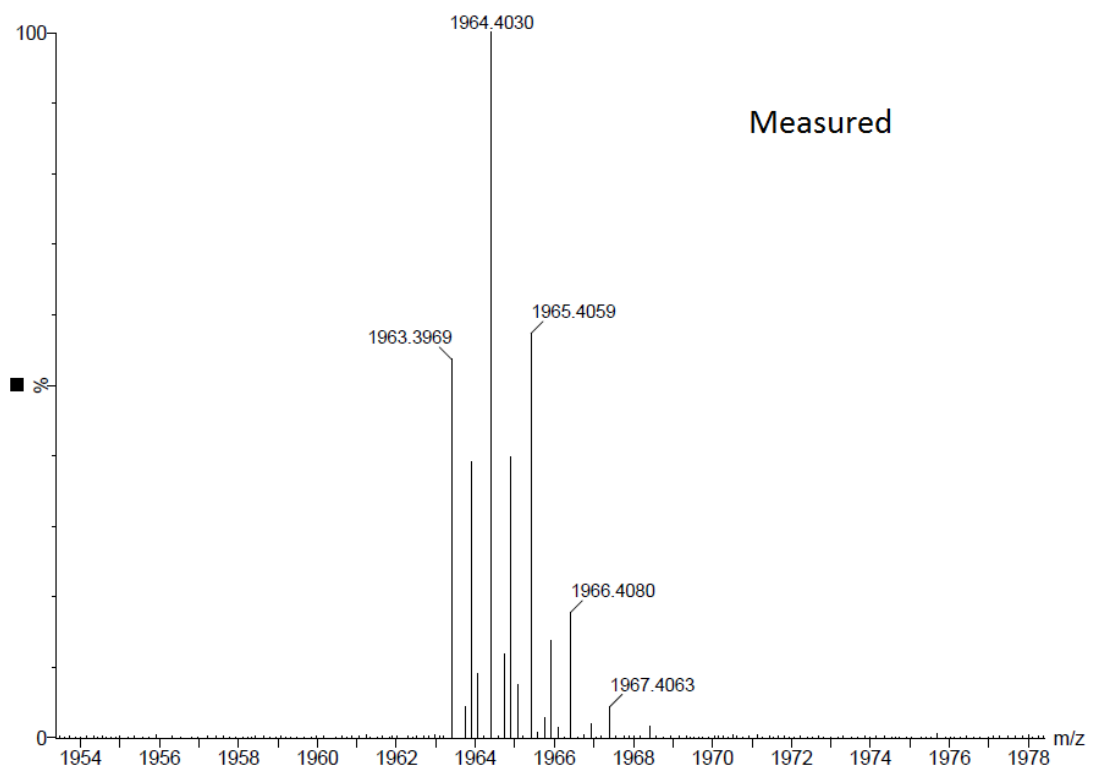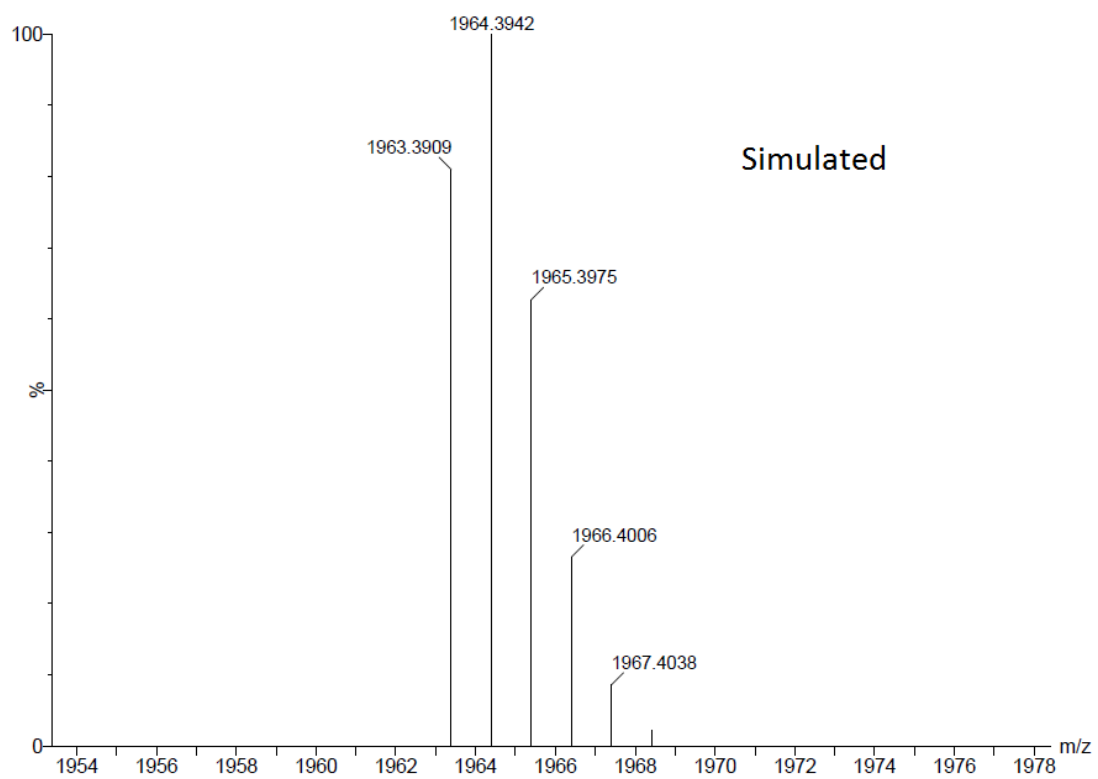

**Fig. S4** Low and high resolution ESI mass spectra of  $\text{NBu}_4[\text{LaL}_4]$  with isotopic patterns.

Sb-EuL24 #34 RT: 1.56 AV: 1 NL: 2.91E5  
T: - c ESI Full ms [200.00-3000.00]

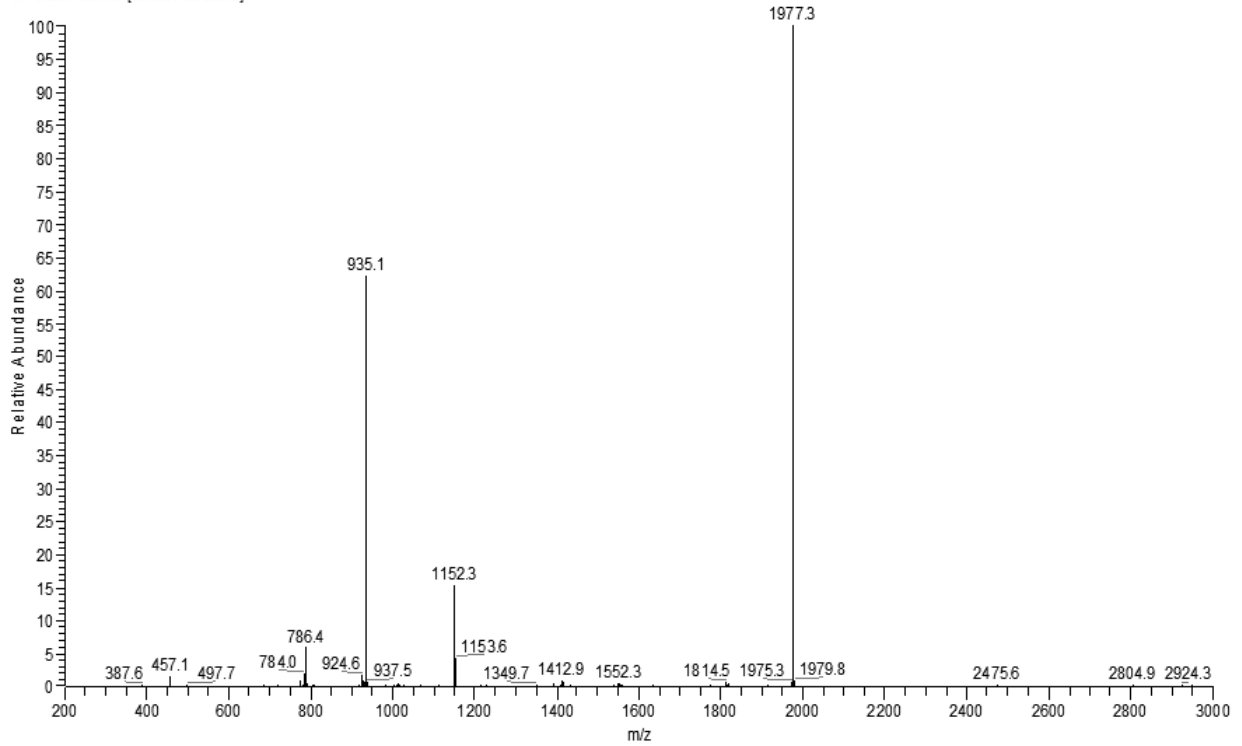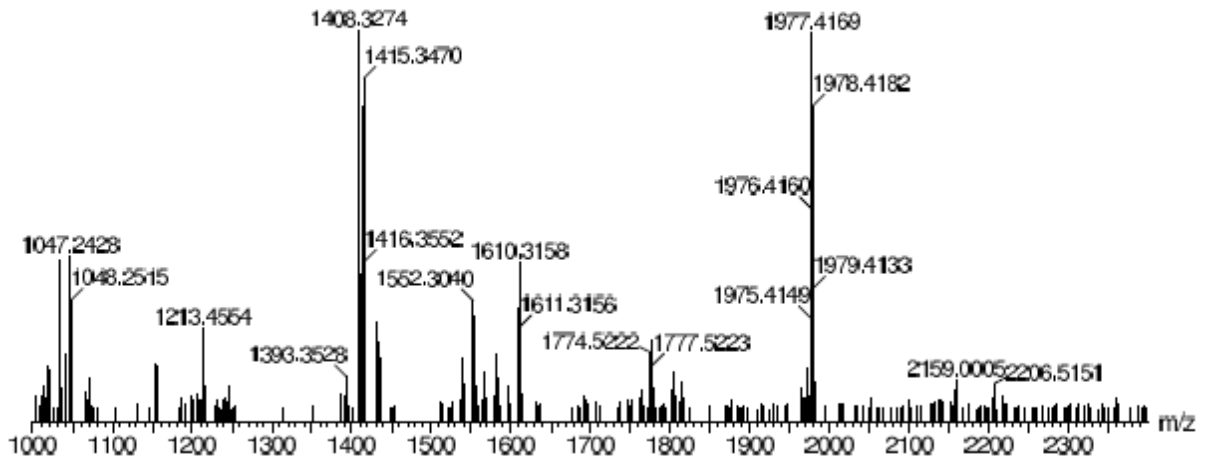

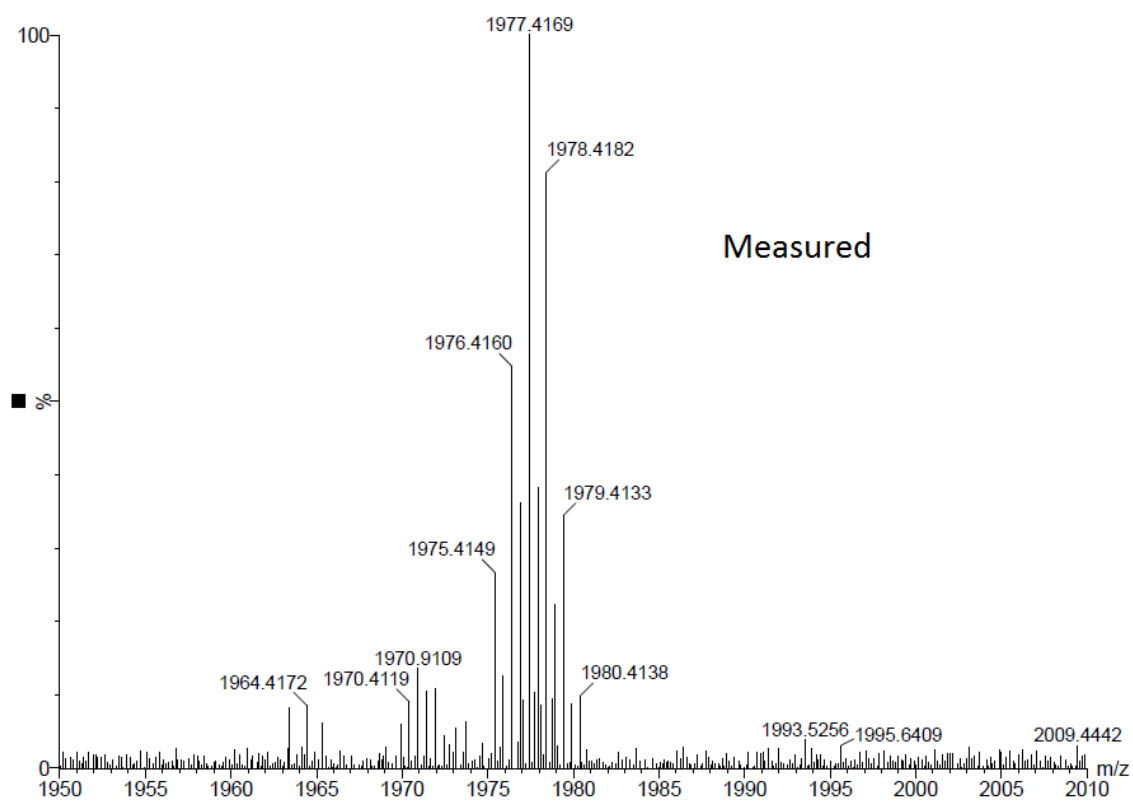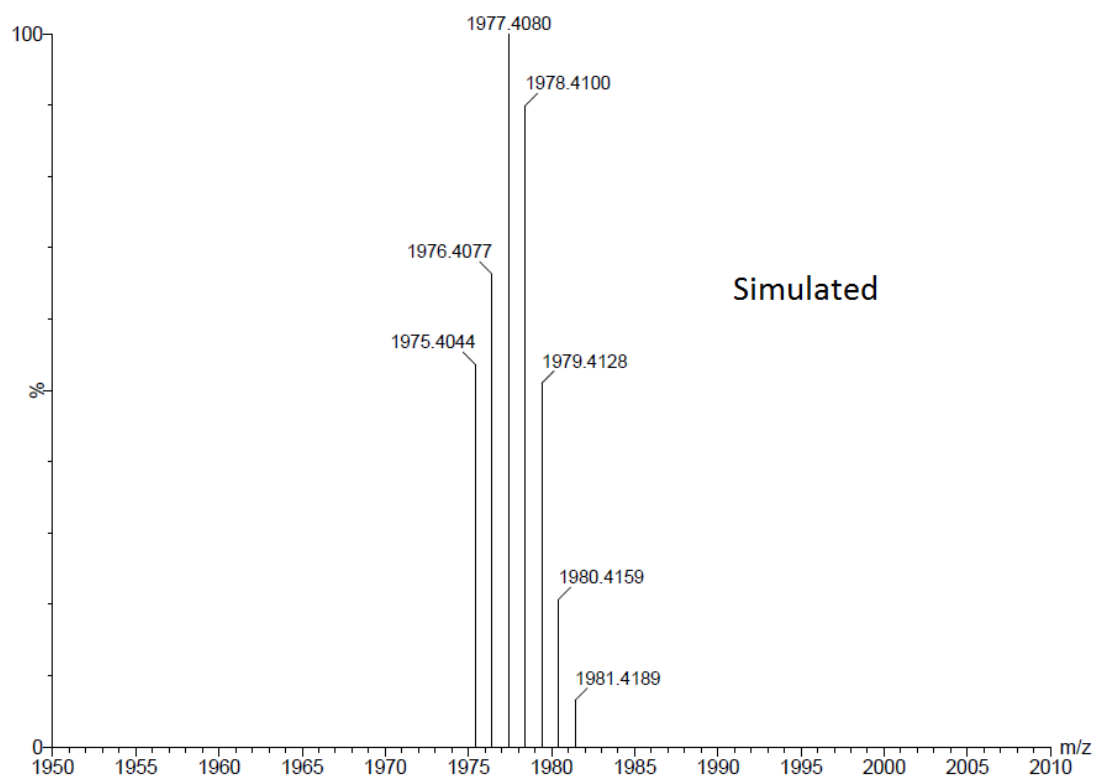

**Fig. S5** Low and high resolution ESI mass spectra of  $\text{NBu}_4[\text{EuL}_4]$  with isotopic patterns.



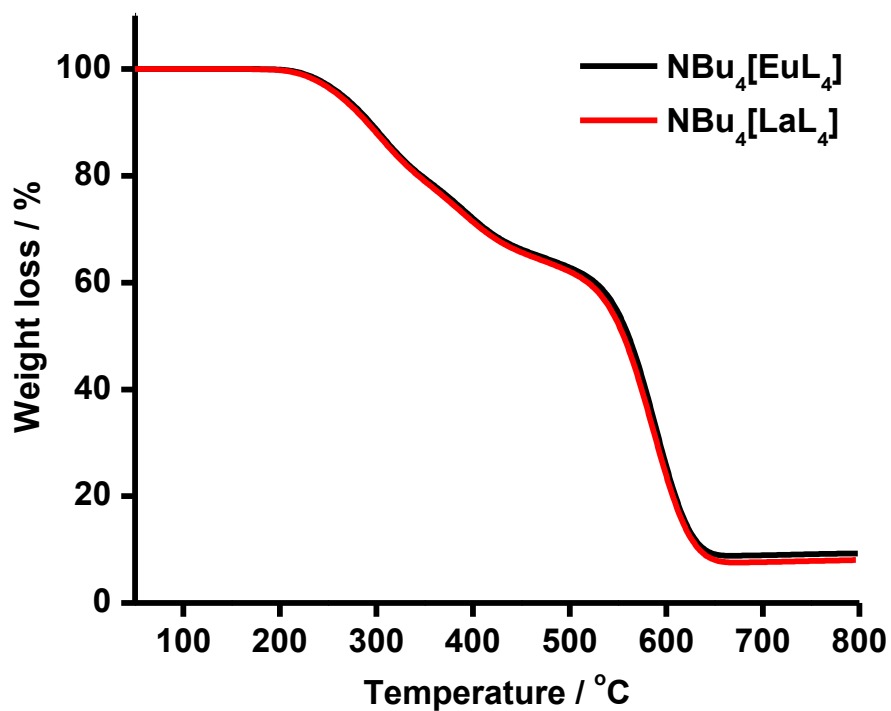

**Fig. S6** Thermogravimetric curves of  $\text{La}^{\text{III}}$  and  $\text{Eu}^{\text{III}}$  complexes.

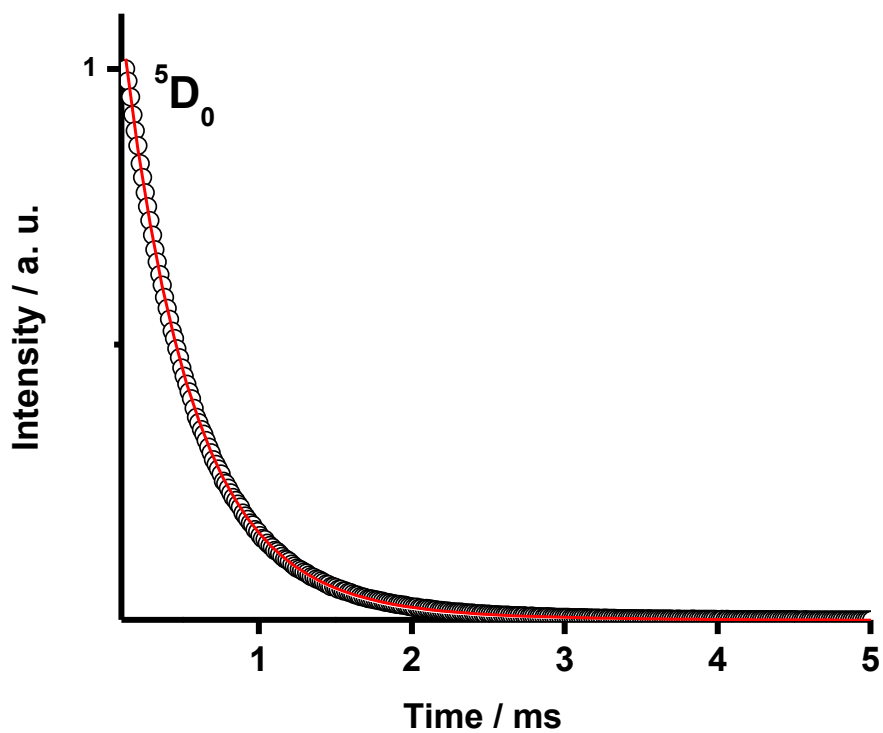

**Fig. S7**  $^5\text{D}_0$  decay profile of  $\text{NBu}_4[\text{EuL}_4]$  at 298 K in solid state ( $\lambda_{\text{ex}} = 400$  nm), monitored at 612 nm.

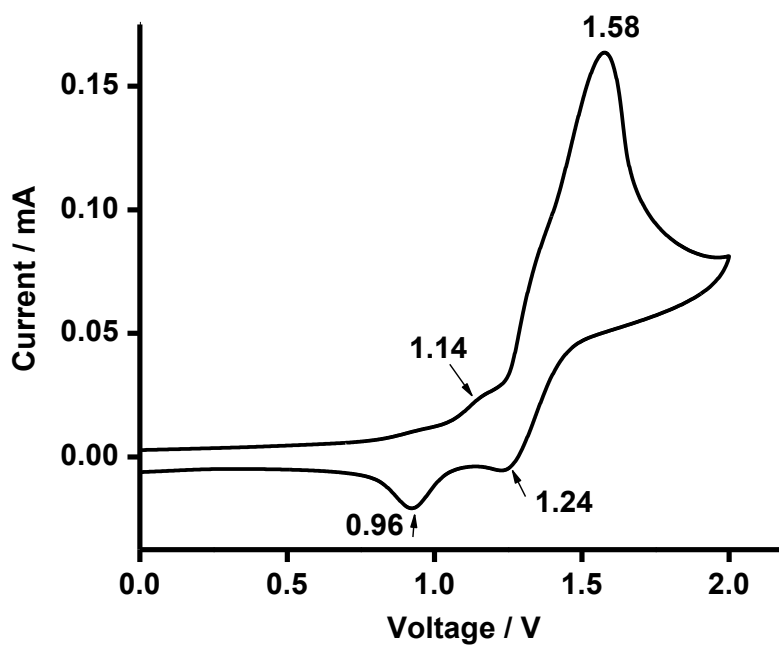

| Complex                              | $E_{1/2}^{ox}(V)$ | $E_g$ (eV) <sup>a</sup> | HOMO  | LUMO  |
|--------------------------------------|-------------------|-------------------------|-------|-------|
| NBu <sub>4</sub> [EuL <sub>4</sub> ] | 1.05              | -3.12                   | -5.82 | -2.70 |

<sup>a</sup>Obtained from UV-Vis absorption spectrum

**Fig. S8** Plot of cyclic voltammogram and HOMO, LUMO values of NBu<sub>4</sub>[EuL<sub>4</sub>].

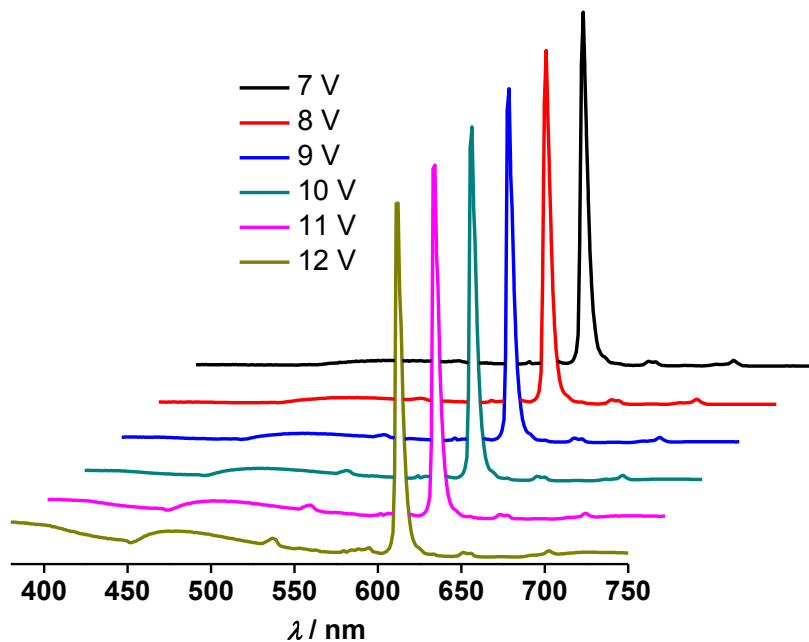

**Fig. S9** Electroluminescence spectra of the device ITO/PEDOT : PSS (50 nm) / NBu<sub>4</sub>[EuL<sub>4</sub>] (30%): CBP (49%)-OXD7 (21%) (50 nm)/TPBI (50 nm)/LiF (1.5 nm)/Al (120 nm) at different voltages.

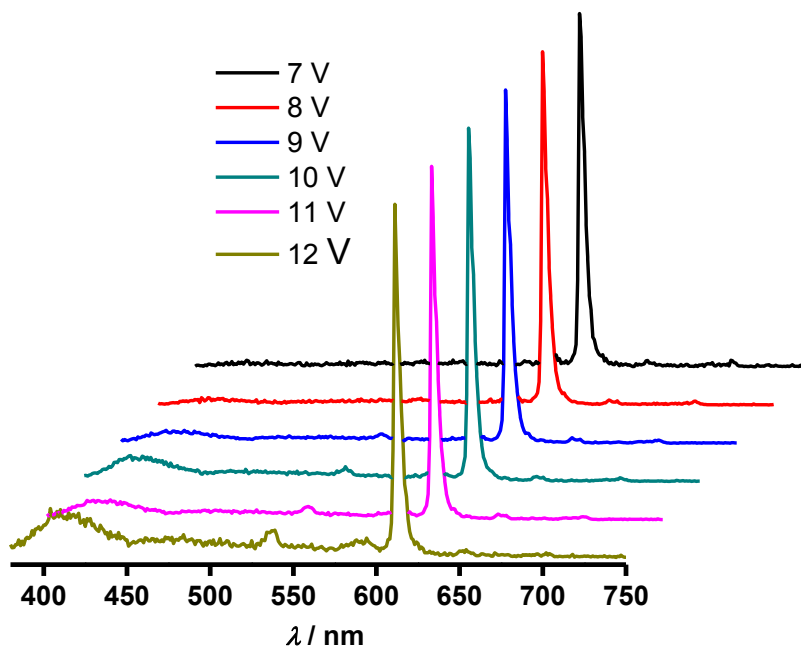

**Fig. S10** Electroluminescence spectra of the device ITO/PEDOT: PSS (50 nm)/ NBu<sub>4</sub> [EuL<sub>4</sub>] (50%): CBP (35%)-OXD7 (15%) (50 nm)/TPBI (50 nm)/LiF (1.5 nm)/Al (120 nm) at different voltages.

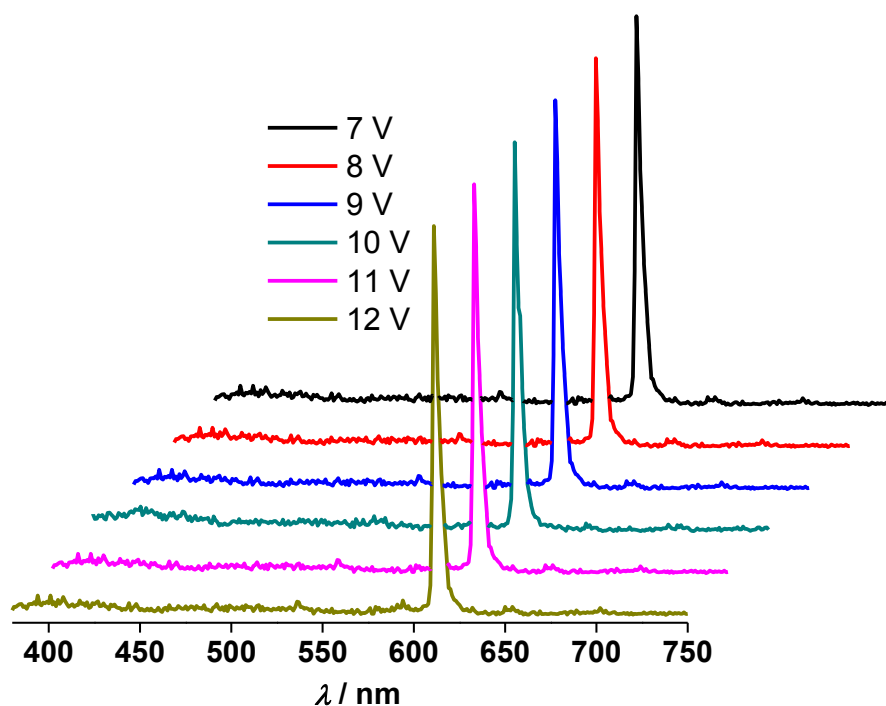

**Fig. S11** Electroluminescence spectra of the device ITO/PEDOT: PSS (50 nm)/NBu<sub>4</sub>[EuL<sub>4</sub>] (50 nm)/TPBI(50 nm)/LiF(1.5 nm)/Al(120 nm) diode at different voltages.

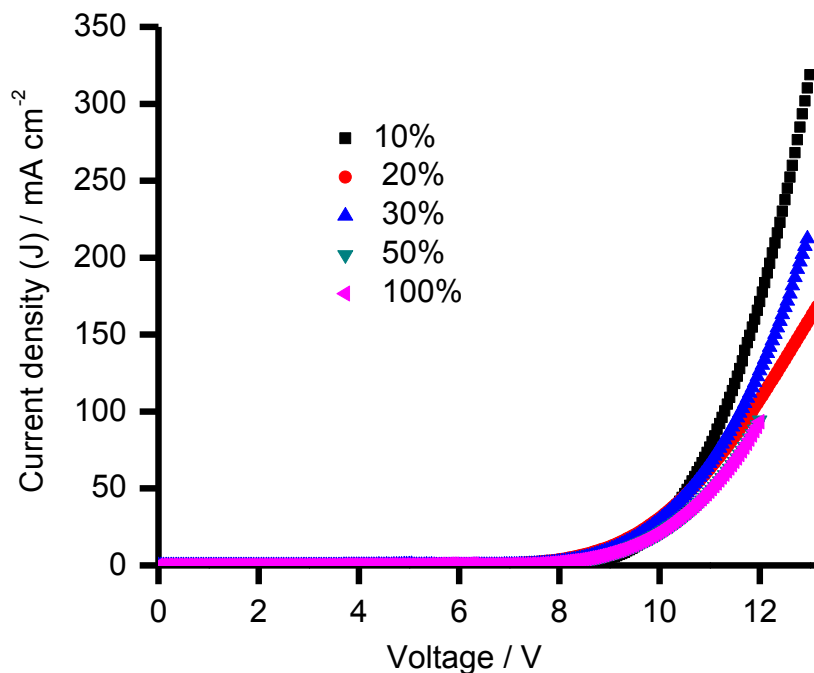

**Fig. S12** Voltage (V)–Current density (*J*) characteristics of the device ITO/PEDOT: PSS(50nm)/NBu<sub>4</sub> [EuL<sub>4</sub>] (10-20%): CBP (70%) - OXD7 (30%) (50 nm)/TPBI (50 nm)/LiF (1.5 nm)/Al (120 nm).

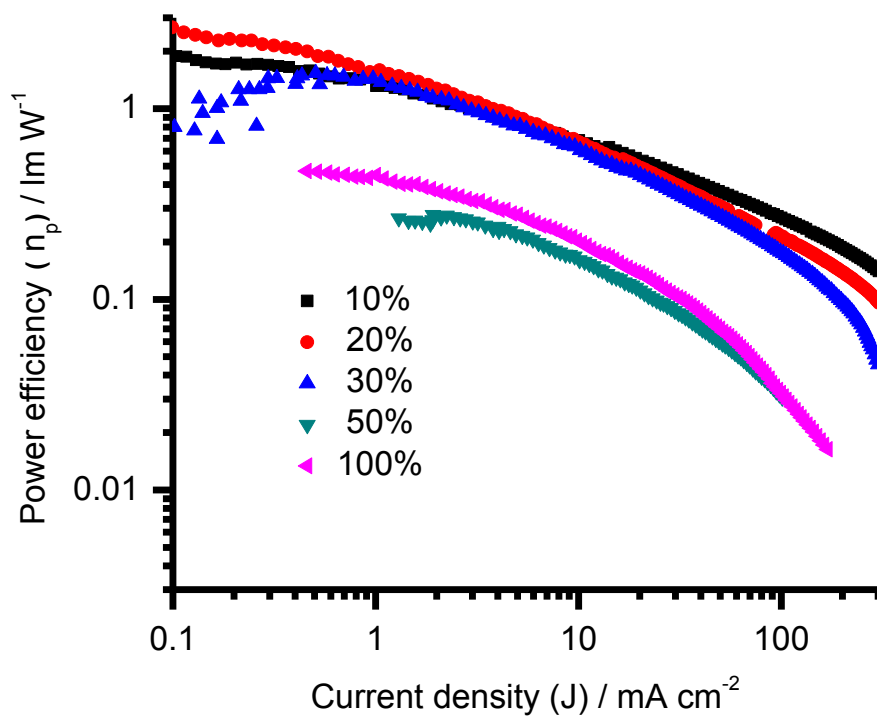

**Fig. S13** Current density ( $J$ ) versus power efficiency ( $\eta_c$ ) of the devices ITO/PEDOT: PSS(50 nm)/NBu<sub>4</sub>[EuL<sub>4</sub>] : CBP-OXD7 (50 nm)/TPBI (50 nm)/LiF (1.5 nm)/Al (120 nm) with the doping percentage of Eu complex being 10%, 20%, 30%, 50%, and 100%, respectively. The weight ratio of mixed host CBP : OXD7 is 7 : 3.
